# Supplementary figures and images for: A consensus prognostic gene expression classifier for ER positive breast cancer
Source: Springer Nature journal article supplement (doi:10.1186/gb-2006-7-10-r101), 2006-10-31

A1)

Realisation-1

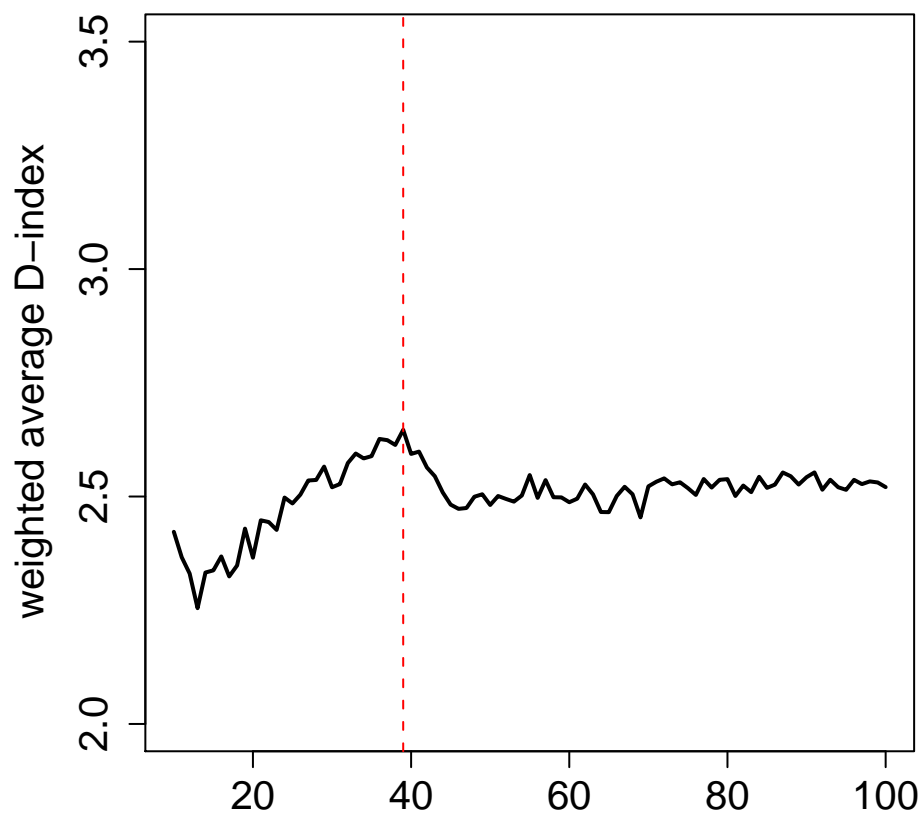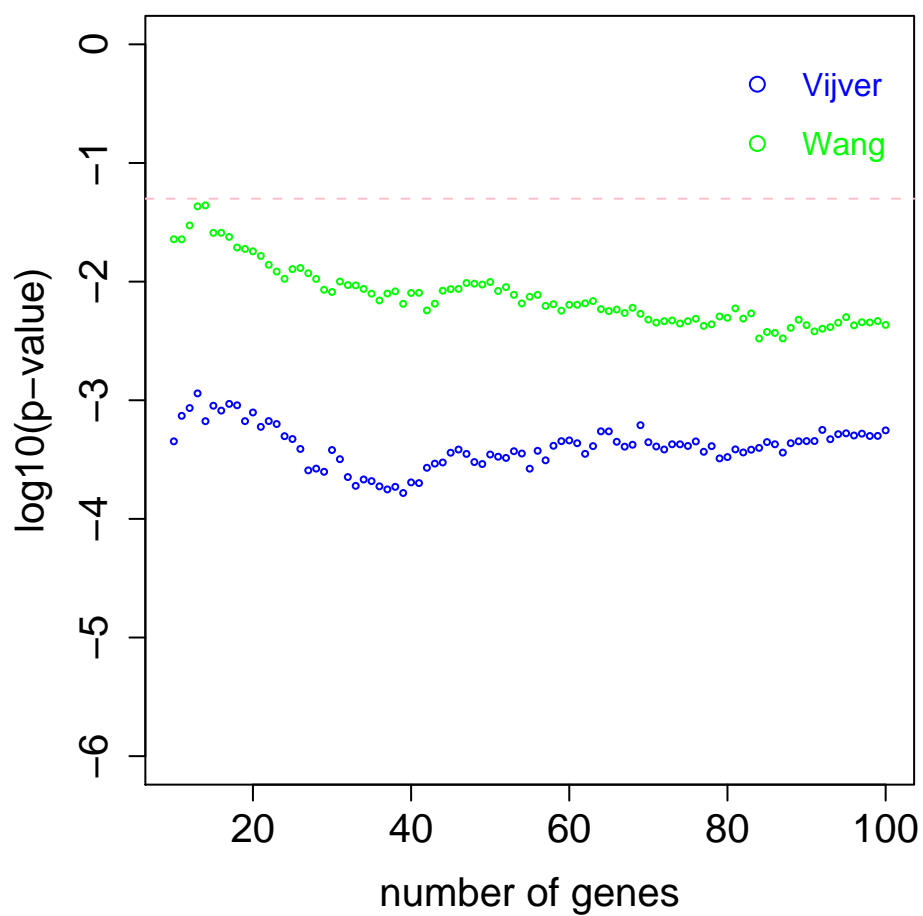

A2)

Realisation-8

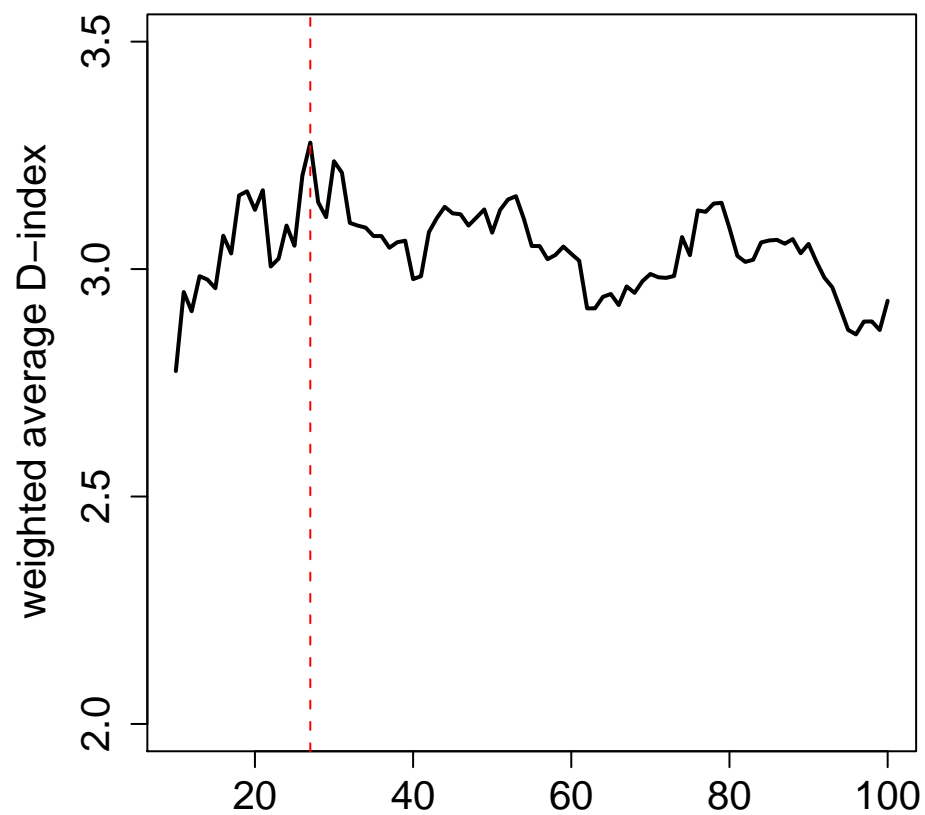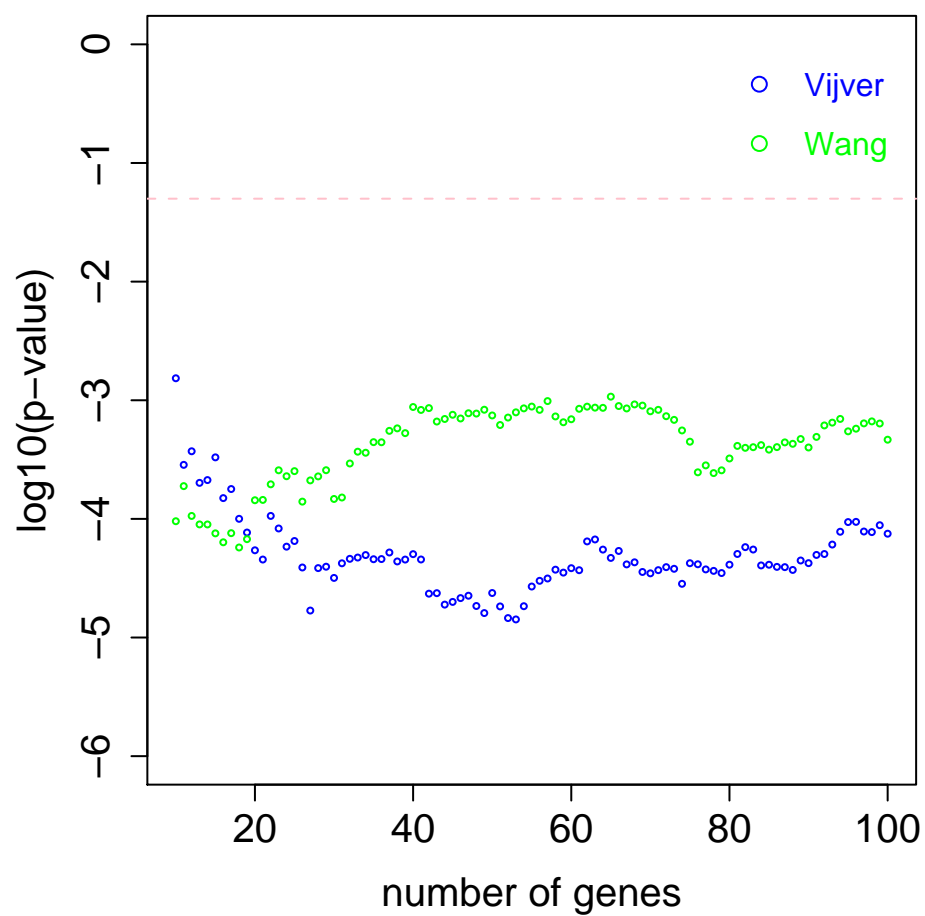

Supplement: Additional file 1 [file gb-2006-7-10-r101-s1.pdf]

**JRH-1: Grade**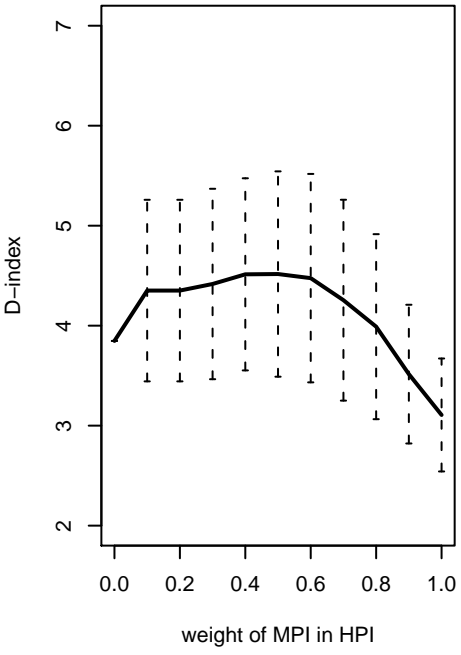**JRH-1: Size**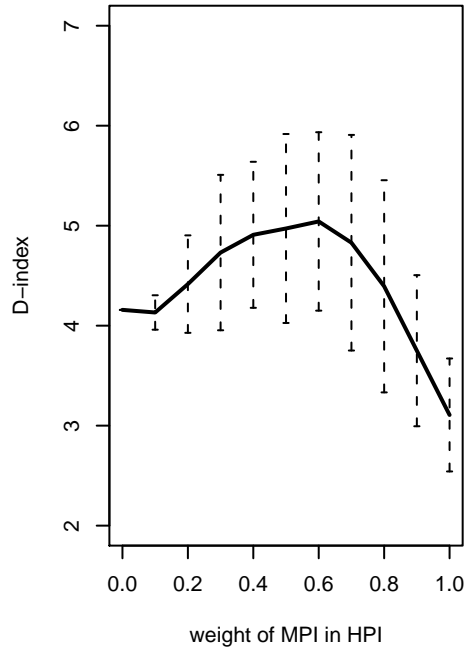**JRH-1: Stage**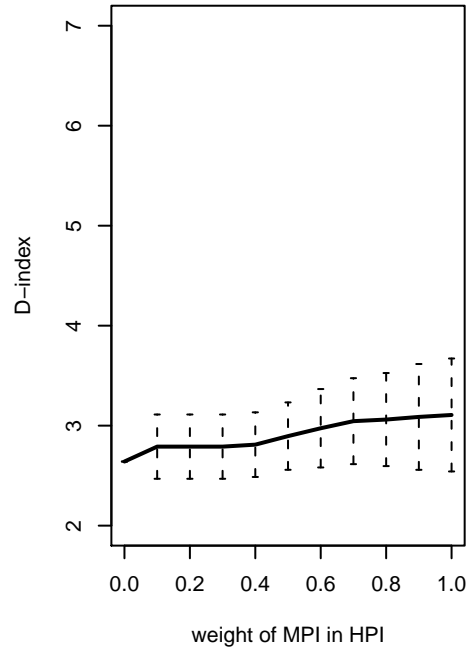**JRH-1: NPI**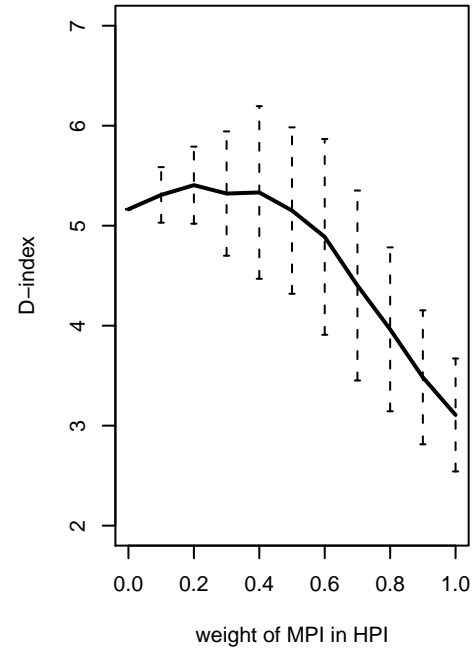**UPP.: Grade**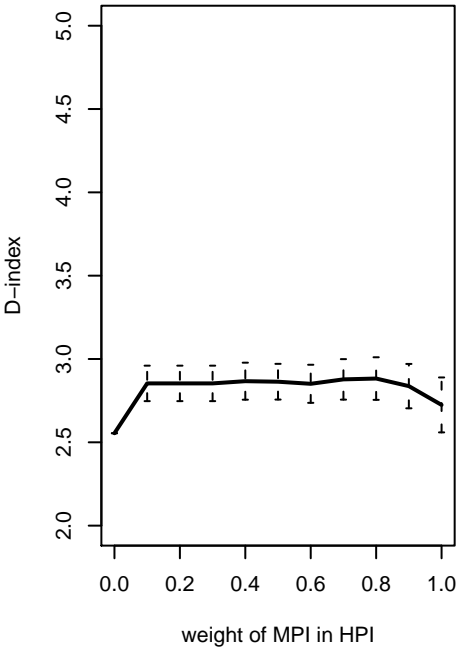**UPP.: Size**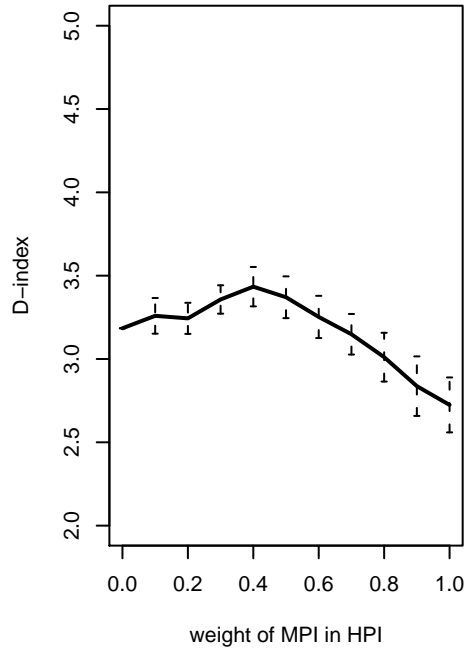**UPP.: Stage**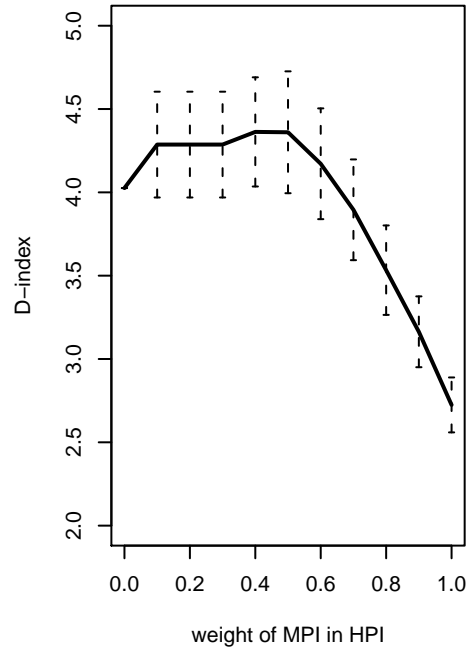**UPP.: NPI**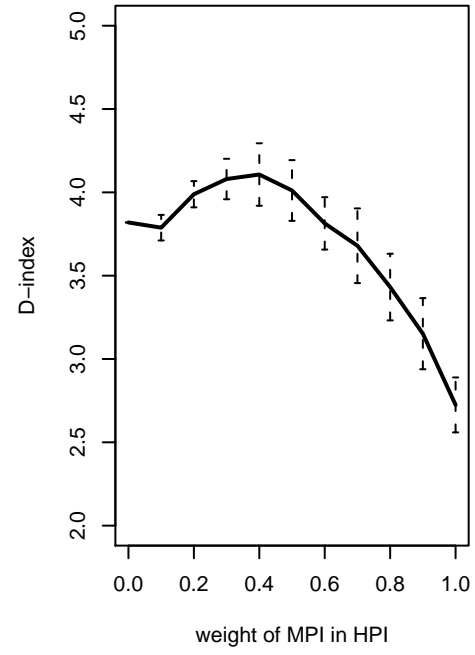**JRH-2: Grade**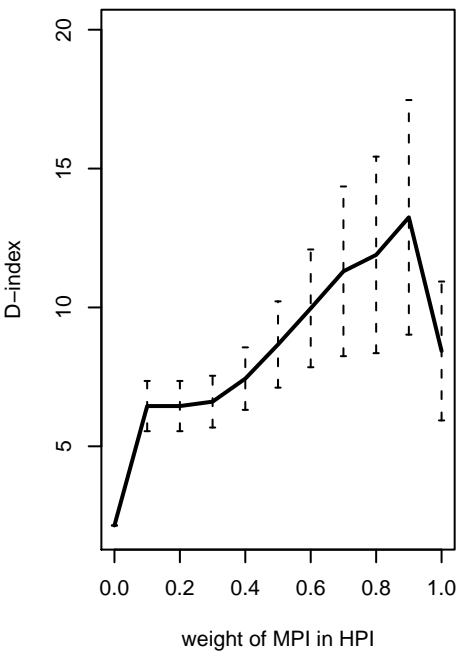**JRH-2: Size**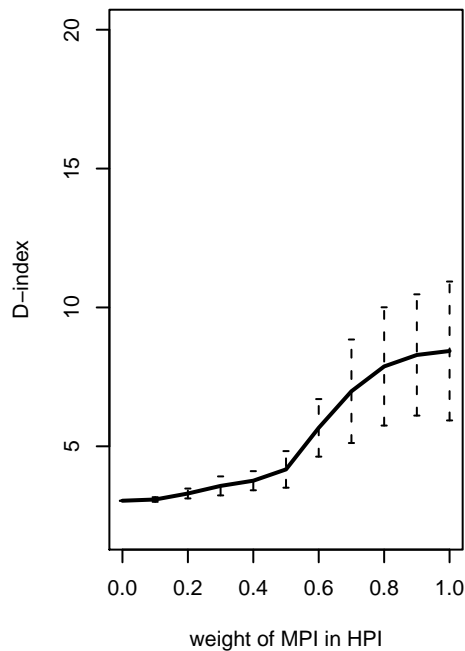

Supplement: Additional file 6 [file gb-2006-7-10-r101-s6.pdf]
